# Supplementary material
Source: PubMed Central journal article supplement (PMC4814172)

**A Metabolome-Wide Association Study of Kidney Function and Disease  
in the General Population**

Peggy Sekula, Oemer-Necmi Goek, Lydia Quaye, Clara Barrios, Andrew S. Levey, Werner Römisch–Margl, Cristina Menni, Idil Yet, Christian Gieger, Lesley A. Inker, Jerzy Adamski, Wolfram Gronwald, Thomas Illig, Katja Dettmer, Jan Krumsiek, Peter Oefner, Ana M. Valdes, Christa Meisinger, Josef Coresh, Tim D. Spector, Robert P. Mohny, Karsten Suhre, Gabi Kastenmüller, Anna Köttgen

**SUPPLEMENTAL MATERIAL**

**Supplemental Figure 1:** Analytical Workflow

**Supplemental Figure 2:** Receiver operating characteristic curves of different models comparing the area under the curve for the ability to predict incident CKD.

**Supplemental Table 1:** All metabolites evaluated at the KORA S4 and F4 Study

**Supplemental Table 2:** Association between all tested metabolites and eGFR<sub>crea</sub>, eGFR<sub>cys</sub> and CKD at the KORA F4 visit as well as all corresponding results from the TwinsUK Study and the combined datasets for metabolites selected for replication

**Supplemental Table 3:** Significant association between tested metabolite ratios and eGFR<sub>crea</sub>, eGFR<sub>cys</sub> and CKD at the KORA F4 visit

**Supplemental Table 4:** Association between all tested metabolites with annual eGFR decline and incident CKD

**Supplemental Table 5:** Characterization of significant kidney function associated metabolites in the KORA F4 study population

**Supplemental Table 6:** Clinical information and metabolites selected for prediction of incident CKD

**Supplemental Table 7:** Significant genetic associations of the highlighted metabolites (Tables 2 and 3) from previous genome-wide association studies of blood metabolite concentrations

Supplemental Figure 1. Analytical Workflow

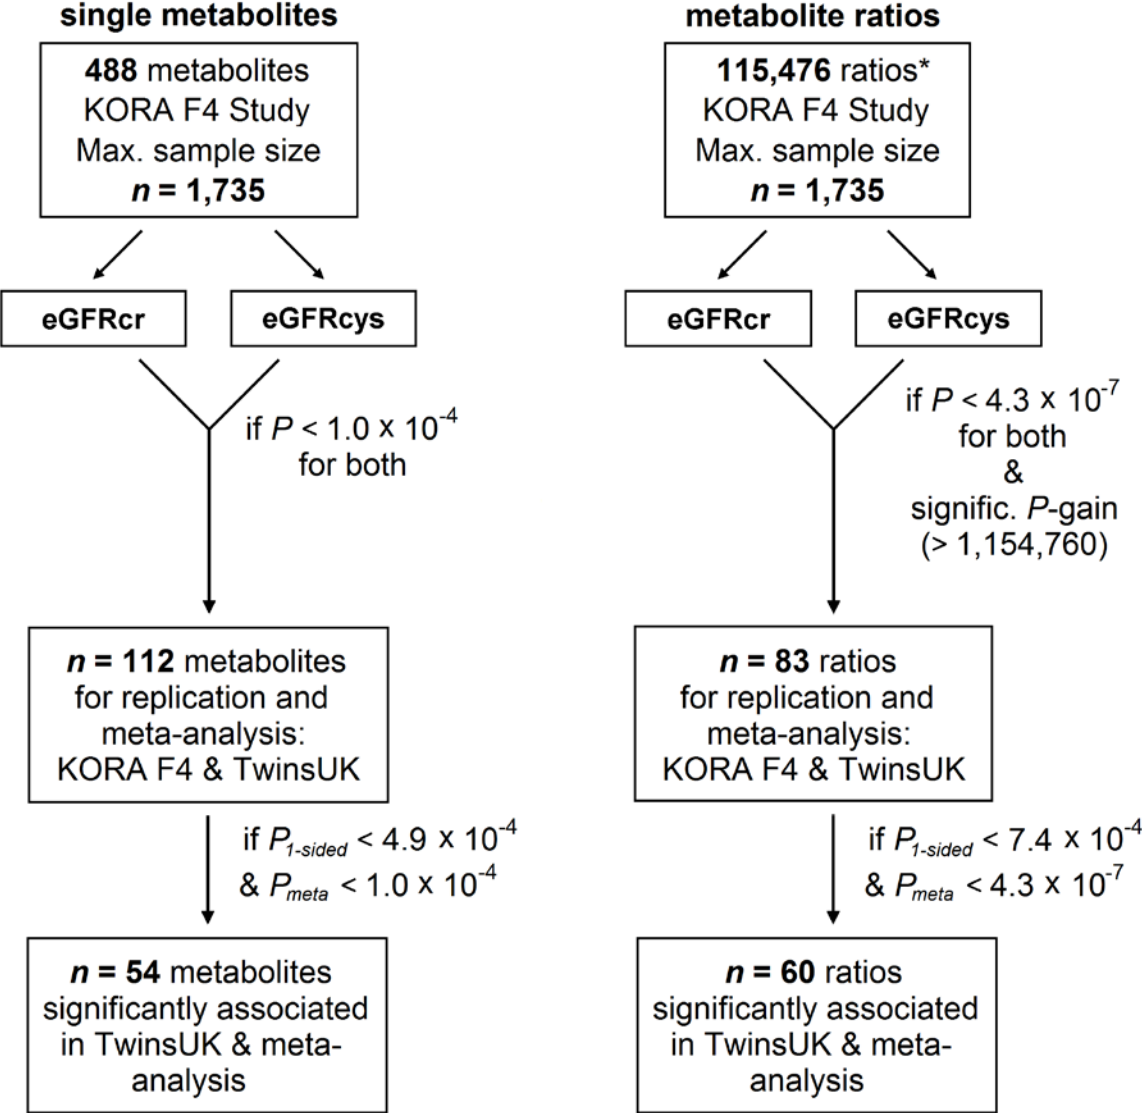

**Supplemental Figure 2.** Receiver operating characteristic curves of different models comparing the area under the curve for the ability to predict incident CKD.

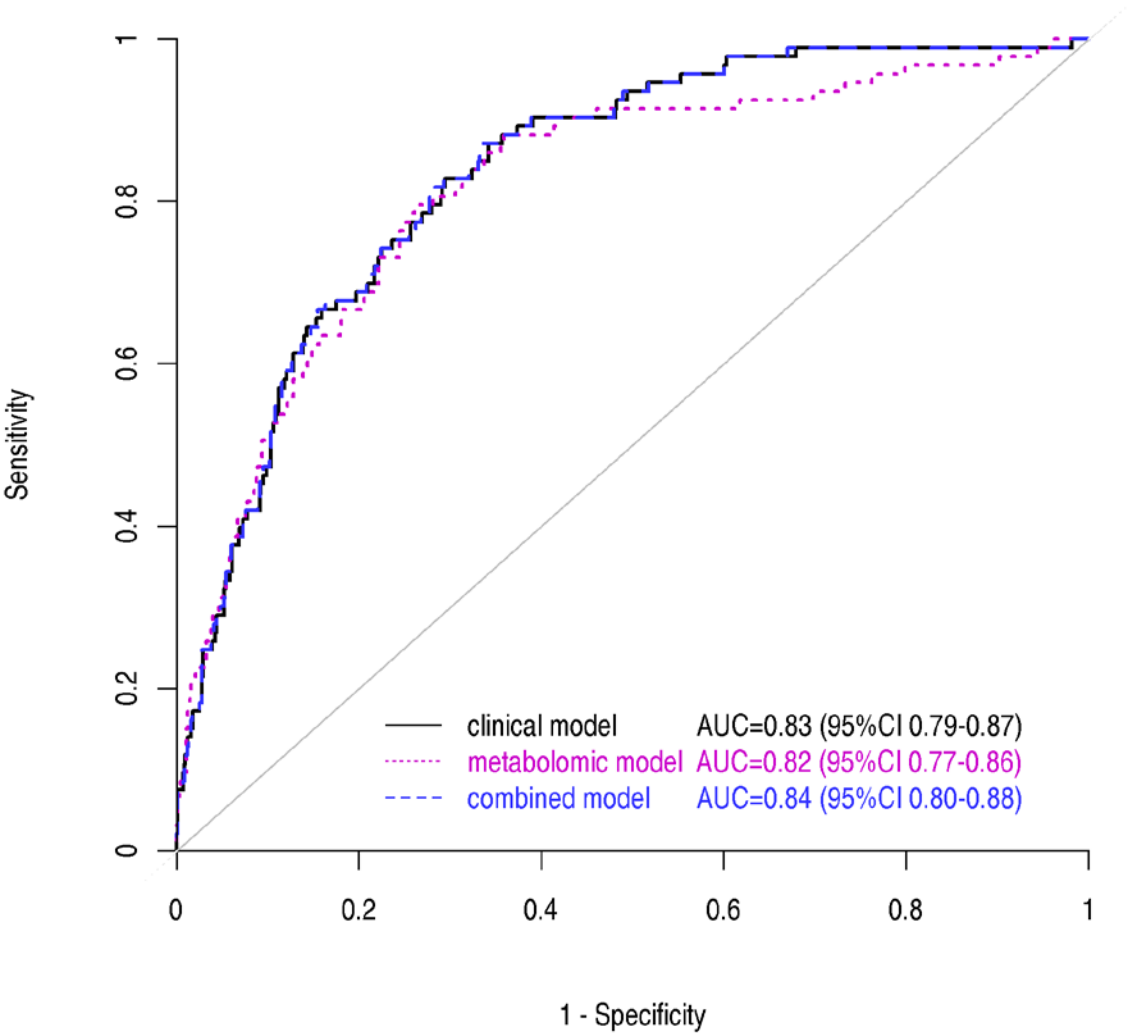

Supplement: ASN.2014111099_ASN2014111099SupplementaryData1.pdf [file ASN.2014111099_ASN2014111099SupplementaryData1.pdf]
